# Supplementary material for: Association of Body Mass Index and Waist Circumference with All-Cause Mortality in Hemodialysis Patients
Source: PubMed Central journal article supplement (PMC7288310; doi:10.3390/jcm9051289), 2020-04-29

**Table S1.** Baseline characteristics of the study population by and waist circumference.

| Characteristics                                            | WC, male/ female, cm |                    |                    |                    |                    |                    | P value |
|------------------------------------------------------------|----------------------|--------------------|--------------------|--------------------|--------------------|--------------------|---------|
|                                                            | < 80/<75             | 80–85/75–80        | 85–90/80–85        | 90–95/85–90        | 95–100/90–95       | ≥ 100/≥ 95         |         |
| Number                                                     | 7006                 | 4125               | 3368               | 2167               | 1140               | 893                |         |
| Age, years, mean ± SD                                      | 57.3±11.5            | 60.4±10.5          | 61.9±10.0          | 62.5±10.0          | 61.7±10.3          | 61.5±10.5          | < 0.001 |
| Age group, years (%)                                       |                      |                    |                    |                    |                    |                    | < 0.001 |
| 20–40                                                      | 343(4.9)             | 105(2.6)           | 46(1.4)            | 31(1.4)            | 25(2.2)            | 15(1.7)            |         |
| 40–65                                                      | 4779(68.2)           | 2584(62.6)         | 1960(58.2)         | 1202(55.5)         | 653(57.3)          | 519(58.1)          |         |
| ≥ 65                                                       | 1884(26.9)           | 1436(34.8)         | 1362(40.4)         | 934(43.1)          | 462(40.5)          | 359(40.2)          |         |
| Female (%)                                                 | 3276(46.8)           | 1534(37.2)         | 1363(40.5)         | 922(42.6)          | 538(47.2)          | 495(55.4)          | < 0.001 |
| Place of residence (%)                                     |                      |                    |                    |                    |                    |                    | 0.625   |
| Urban living                                               | 3134(44.7)           | 1876(45.5)         | 1511(44.9)         | 965(44.5)          | 489(42.9)          | 385(43.1)          |         |
| Rural living                                               |                      |                    |                    |                    |                    |                    |         |
| Smoking (%)                                                |                      |                    |                    |                    |                    |                    | < 0.001 |
| Non                                                        | 4783(68.3)           | 2596(62.9)         | 2209(65.6)         | 1446(66.7)         | 747(65.5)          | 629(70.4)          |         |
| Former                                                     | 1456(20.8)           | 1051(25.5)         | 806(23.9)          | 512(23.6)          | 271(23.8)          | 177(19.8)          |         |
| Current                                                    | 767(11.0)            | 478(11.6)          | 353(10.5)          | 209(9.6)           | 122(10.7)          | 87(9.7)            |         |
| Alcohol consumption                                        |                      |                    |                    |                    |                    |                    | 0.046   |
| None (%)                                                   | 6406(91.4)           | 3737(90.6)         | 3085(91.6)         | 1955(90.2)         | 1031(90.4)         | 832(93.2)          |         |
| Moderate (%)                                               | 562(8.1)             | 352(8.5)           | 271(8.1)           | 195(9.0)           | 100(8.8)           | 55(6.2)            |         |
| Heavy (%)                                                  | 38(0.5)              | 36(0.9)            | 12(0.4)            | 17(0.8)            | 9(0.8)             | 6(0.7)             |         |
| Regular exercise (%)                                       |                      |                    |                    |                    |                    |                    | < 0.001 |
| No                                                         | 5962(85.1)           | 3487(84.5)         | 2879(85.5)         | 1876(86.6)         | 1033(90.6)         | 813(91.0)          |         |
| Yes                                                        | 1044(14.9)           | 638(15.5)          | 489(14.5)          | 291(13.4)          | 107(9.4)           | 80(9.0)            |         |
| Diabetes mellitus (%)                                      | 2477(35.4)           | 1910(46.3)         | 1753(52.1)         | 1207(55.7)         | 686(60.2)          | 626(70.1)          | < 0.001 |
| Hypertension (%)                                           | 5494(78.4)           | 3325(80.6)         | 2693(80.0)         | 1708(78.8)         | 894(78.4)          | 706(79.1)          | 0.097   |
| Dyslipidemia (%)                                           | 1982(28.3)           | 1494(36.2)         | 1292(38.4)         | 907(41.9)          | 524(46.0)          | 478(53.5)          | < 0.001 |
| CKD (%)                                                    | 6726(96.0)           | 3966(96.2)         | 3226(95.8)         | 2101(97.0)         | 1109(97.3)         | 861(96.4)          | 0.091   |
| Cardiovascular disease (%)                                 | 1282(18.3)           | 1024(24.8)         | 846(25.1)          | 589(27.2)          | 332(29.1)          | 252(28.2)          | < 0.001 |
| Cancer (%)                                                 | 220(3.1)             | 121(2.9)           | 88(2.6)            | 64(3.0)            | 35(3.1)            | 27(3.0)            | < 0.001 |
| Low income (%)                                             |                      |                    |                    |                    |                    |                    | < 0.001 |
| No                                                         | 4205(60.0)           | 2615(63.4)         | 2201(65.4)         | 1413(65.2)         | 732(64.2)          | 544(60.9)          |         |
| Yes                                                        | 2801(40.0)           | 1510(36.6)         | 1167(34.7)         | 754(34.8)          | 408(35.8)          | 349(39.1)          |         |
| BMI, kg/m <sup>2</sup> , mean ± SD                         | 20.3±1.9             | 22.4±1.8           | 23.7±2.0           | 25.0±2.2           | 26.6±2.4           | 29.2±3.3           | < 0.001 |
| WC, cm, mean ± SD                                          | 71.5±5.0             | 80.1±2.8           | 84.8±2.8           | 89.6±2.8           | 94.3±2.9           | 101.7±5.0          | < 0.001 |
| SBP, mmHg, mean ± SD                                       | 133.6±20.3           | 135.0±20.1         | 134.1±19.7         | 134.2±19.9         | 134.7±20.1         | 135.8±20.7         | 0.002   |
| DBP, mmHg, mean ± SD                                       | 78.2±12.0            | 78.1±11.6          | 77.6±11.5          | 77.2±11.9          | 77.4±11.8          | 78.0±11.8          | 0.005   |
| Fasting glucose, mg/dL, mean ± SD                          | 107.2±43.3           | 114.3±45.8         | 117.5±49.0         | 120.8±51.3         | 123.4±51.9         | 133.6±55.5         | < 0.001 |
| Total cholesterol, mg/dL, mean ± SD                        | 166.8±37.9           | 165.0±38.4         | 167.6±40.0         | 167.6±40.0         | 166.5±40.7         | 170.3±42.9         | 0.002   |
| High-density lipoprotein, mg/dL, mean ± SD                 | 53.5±15.9            | 48.6±15.2          | 46.6±13.8          | 44.4±12.9          | 43.6±13.3          | 42.4±12.8          | < 0.001 |
| Low-density lipoprotein, mg/dL, mean ± SD                  | 92.6±31.7            | 92.6±32.4          | 95.0±33.4          | 94.6±33.9          | 93.0±33.9          | 93.8±36.1          | 0.004   |
| Triglyceride, mg/dL, (25 <sup>th</sup> –75 <sup>th</sup> ) | 92.8(91.8–93.8)      | 106.0(104.4–107.5) | 116.4(114.5–118.3) | 127.1(124.5–129.7) | 132.6(128.8–136.5) | 151.6(146.5–156.9) | < 0.001 |

Abbreviations: CKD, chronic kidney disease; BMI, body mass index; WC, waist circumference; SBP, systolic blood pressure; DBP, diastolic blood pressure; SD, standard deviation.

**Figure S1. Smoothed hazard ratios curves of the associations of BMI and WC with all-cause mortality in hemodialysis patients, stratified by diabetes, hypertension, cardiovascular disease and cancer.** Log hazard ratios are adjusted for age; sex; smoking status; alcohol consumption; regular exercise status; low income; previous history of diabetes, hypertension, dyslipidemia, cardiovascular disease and cancer; and BMI or WC, appropriately. BMI, body mass index; WC, waist circumference; CI, confidence interval.

Figure S1

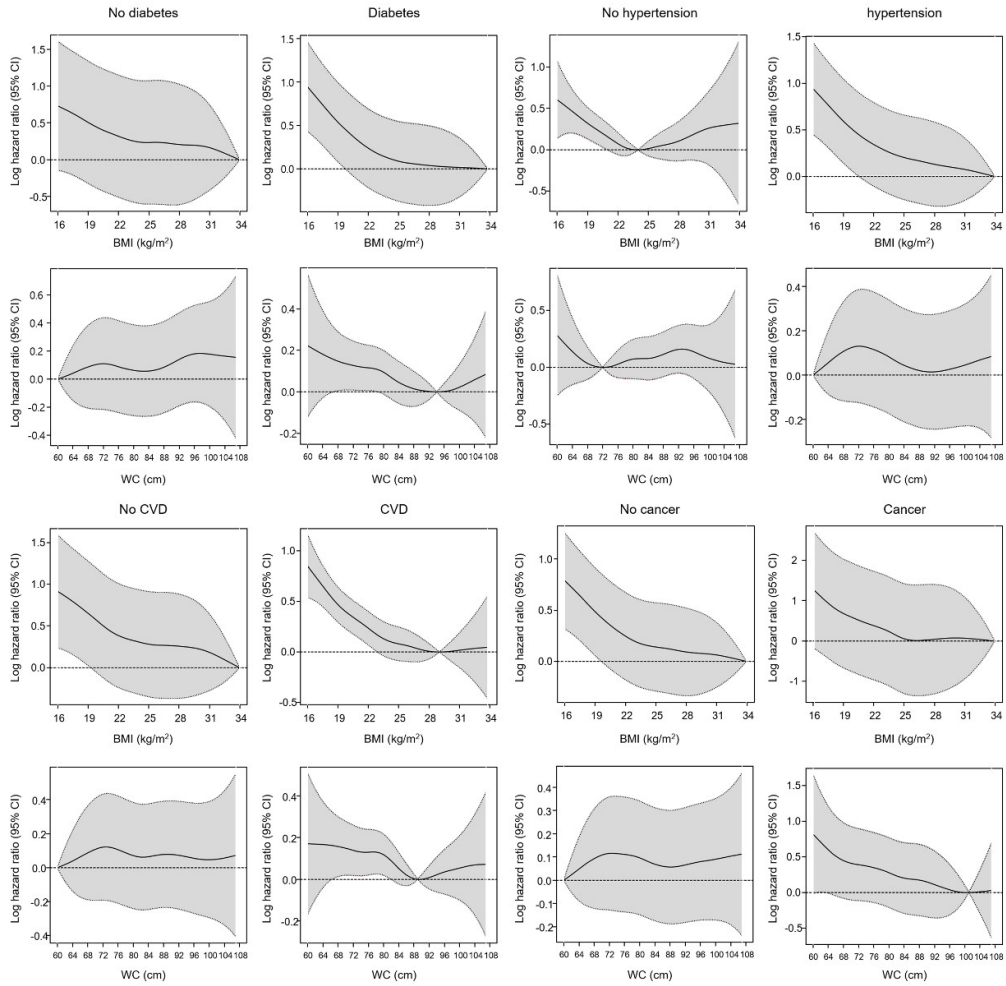

Supplement: jcm-09-01289-s001.pdf [file jcm-09-01289-s001.pdf]
